# Supplementary material
Source: publisher site journal article supplement (https://www.dovepress.com/get_supplementary_file.php?f=440200.docx)
Supplement: Supplementary file 1 [file get_supplementary_file.php]

ORIGINAL RESEARCH

Mei-Yu Lv et al

**Abhd2, a candidate gene regulating airway remodeling in COPD via TGF-β**

Mei-Yu Lv1, 2, Ling-Ling Jin2, 3, Xi-Qiao Sang2, Wen-Chao Shi2, Li-Xia Qiang2, Qing-Yan Lin4, and Shou-De Jin2, *

1Department of Respiratory Medicine, Harbin Medical University Cancer Hospital, Harbin, 150001, China.

2Department of Respiratory Medicine, the Fourth Affiliated Hospital of Harbin Medical University, Harbin, 150001, China.

3Department of Critical care medicine，The Second Affiliated Hospital of Xi 'an Jiaotong University.

4Department of Respiratory Medicine, Heilongjiang Provincial Hospital, Harbin, 150001, China.

Correspondence: Shou-De Jin.

Department of Respiratory Medicine, The Fourth Affiliated Hospital of Harbin Medical University, No. 37 Yiyuan Street, Nangang District, Harbin 150001, China.

Tel [+86 0451-85939123]

Fax [+86 0451-85939123]

Email [jinshoude@163.com]

**Table S1**. Primer sequences of inflammatory factors in mouse lung tissue

| **Target genes** | **Primer** | **Sequences** |
| --- | --- | --- |
| **IL-1α** | forward | 5′-TTGTTTGATGTTGCTGACACC-3′ |
|  | Reverse | 5′-CCTCTCAAGCAGAGCACAGA-3′ |
| **IL-1β** | forward | 5′-GCAACTGTTCCTGAACTCA-3′ |
|  | Reverse | 5′-CTCGGAGCCTGTAGTGCAG-3′ |
| **IL-8** | forward | 5′-CGGCAATGAAGCTTCTGTAT-3′ |
|  | Reverse | 5′-CCTTGAAACTCTTTGCCTCA-3′ |
| **NF-κB** | forward | 5′-GGGGCCTGCAAAGGTTATC-3′ |
|  | Reverse | 5′-TGCTGTTACGGTGCATACCC-3′ |
| **TGF-β** | forward | 5′-TACAGGGCTTTCGATTCAGC-3′ |
|  | Reverse | 5′-CGCACACAGCAGTTCTTCTC-3′ |
| **TNF-α** | forward | 5′-CCAGACCCTCACACTCAGAT-3′ |
|  | Reverse | 5′-AACACCCATTCCCTTCACAG-3′ |
| **GAPDH** | forward | 5′-GGGCTCTCTGCTCCTCCCTGTT-3′ |
|  | Reverse | 5′-AGGCGTCCGATACGGCCAAA-3′ |

**Table S2.** Measurement of clinical airway diameter and airway wall thickness

| **Groups** | **Overall** | **COPD** | **Control** | **P value** |
| --- | --- | --- | --- | --- |
| **Participants (n)** | 83 | 53 | 30 | / |
| **TD** | 17.70 ± 3.94 | 17.73 ± 4.30 | 17.65 3.28 | 0.929 |
| **AD** | 17.36 ± 3.09 | 17.82 ± 3.36 | 16.55 2.38 | 0.071 |
| **RTD** | 15.13 ± 2.81 | 15.12 3.13 |  | 0.944 |
| **RAD** | 13.37 ± 2.55 | 13.71 |  | 0.109 |
| **TWT** | 2.20 ± 0.49 | 2.38 |  | ＜0.001 |
| **BWT** | 1.36 ± 0.45 | 1.45 | 1.19 | 0.010 |

**Note**: Data presented as mean ± SD, and t-test was used for comparison between groups (*P* < 0.05).

**Abbreviation**: AD, anteroposterior diameter; BWT, bronchial wall thickness; RAD, right anteroposterior diameter; RTD, right tracheal transverse diameter; TD, tracheal transverse diameter; TWT, tracheal wall thickness.

**Table S3**. Body weight changes in mice after cyclic injection of CSE (g)

| **Groups** | **CSE1** | **CSE2** | **CSE3** | **CSE4** | **CSE5** |
| --- | --- | --- | --- | --- | --- |
| **N** | 8/8 | 8/7 | 8/5 | 8/5 | 7/5 |
| **WTSM** | 19.34 ± 2.15 | 22.16 2.99 | 23.69 ± 3.14 | 25.20 ± 3.06 | 27.00 ± 2.62 |
| **ABSM** | 18.23 1.36 | 20.54 ± 1.37 | 21.69 ± 1.47 | 22.84 ± 1.98 | 23.84 ± 1.91 |
| **P value** | 0.235 | 0.199 | 0.214 | 0.156 | 0.046 |

**Note**: Data were shown as mean ± SD. N referred to the number of remaining C57BL6 and *Abhd2Gt/Gt* mice surviving at the corresponding cycle.

**Abbreviation**: WTSM, wild-type+ CSE group; ABSM, *Abhd2Gt/Gt* + CSE group.


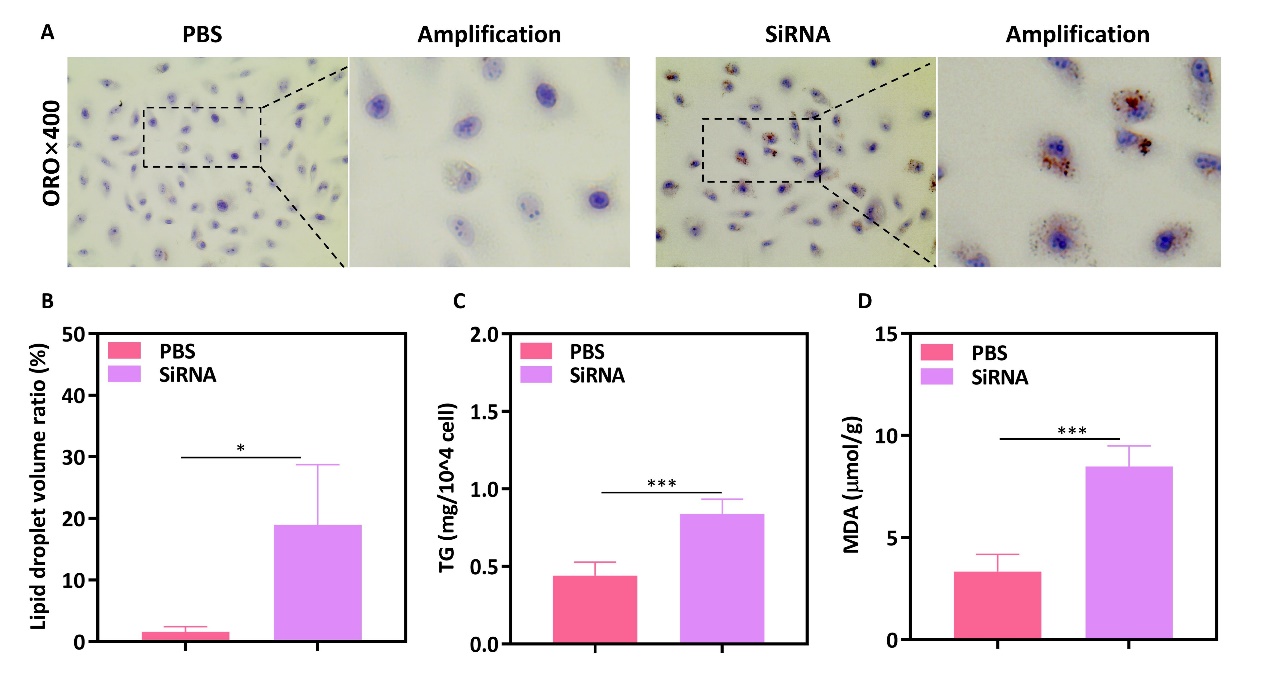


**Figure S1.** Measurement of lipid metabolism. (A) Oil red staining results confirmed fat deposition in cells with *Abhd2* gene silencing (Magnification×400). (B) Increased lipid droplet volume ratio in cells with *Abhd2* gene silencing. (C) Triglyceride deposition in *Abhd2* gene silencing group. (D) Increased malondialdehyde in *Abhd2* gene silencing group.

**P* < 0.05, ****P* < 0.001.


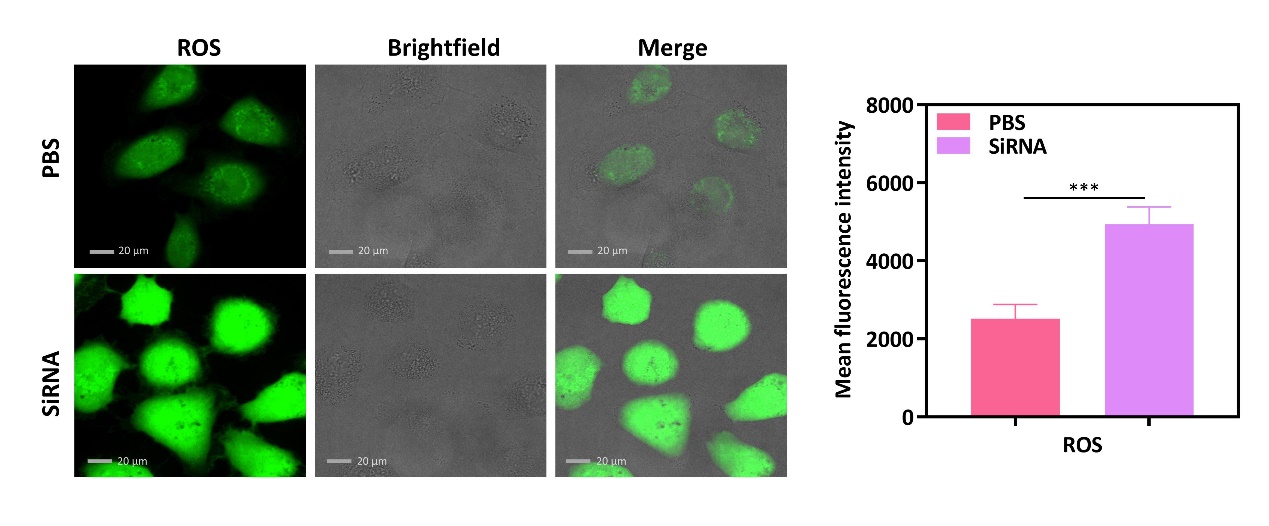


**Figure S2**. Increased ROS in cells with *Abhd2* gene silencing (Magnification×400).

****P* < 0.001
